# Supplementary material for: Chaga mushroom extract suppresses oral cancer cell growth via inhibition of energy metabolism
Source: PubMed Central journal article supplement (PMC11078932; doi:10.1038/s41598-024-61125-z), 2024-05-09

# Supplementary Figure 1

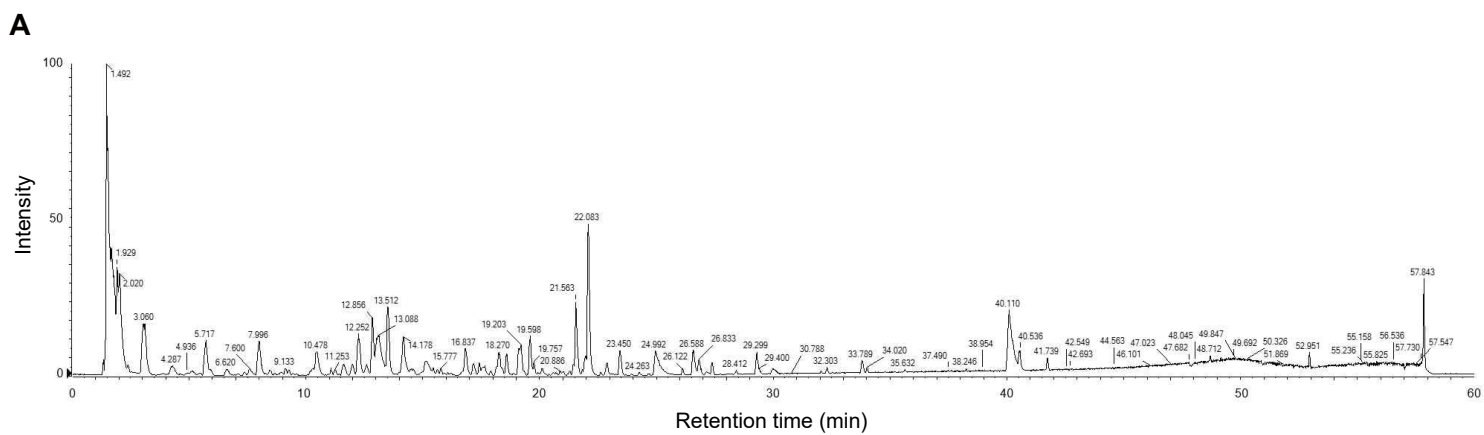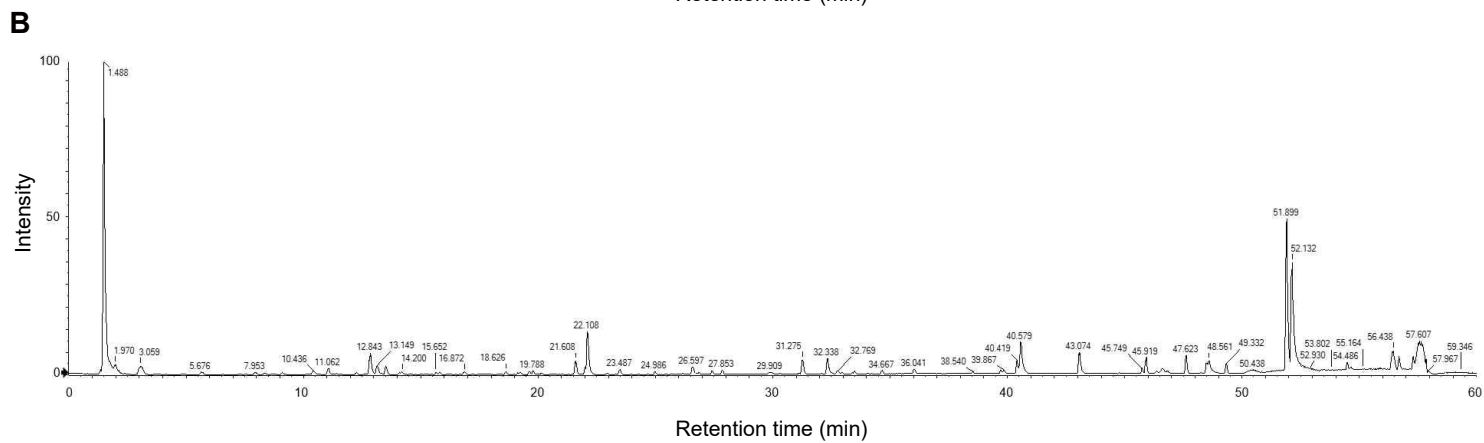

# Supplementary Figure 2

**A**

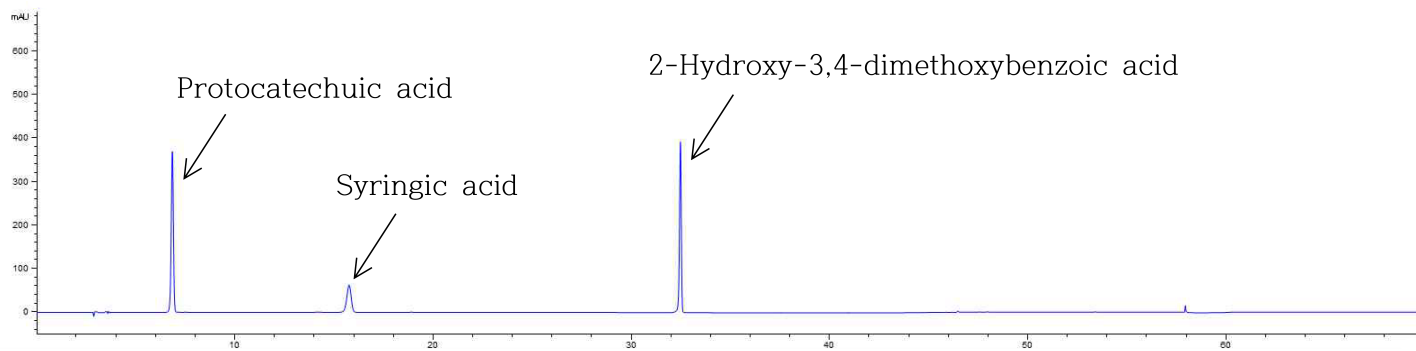

**B**

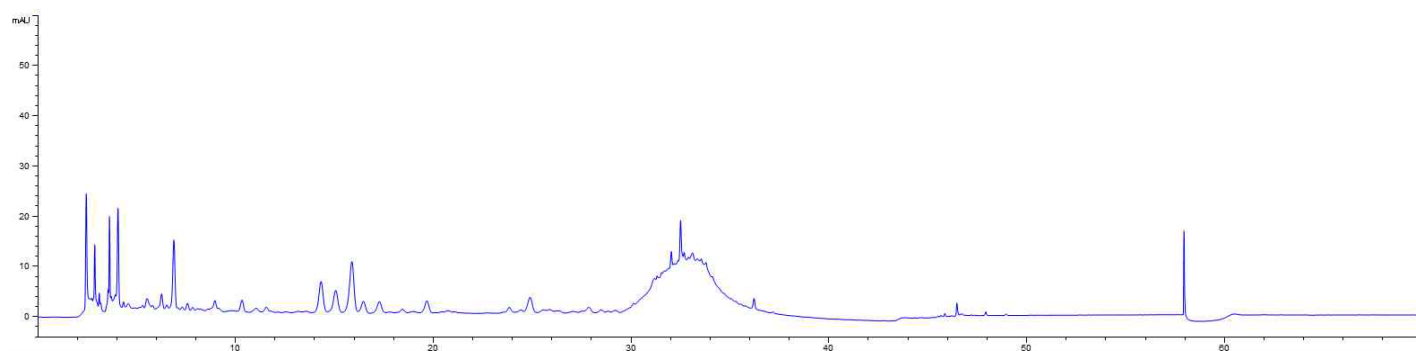

**C**

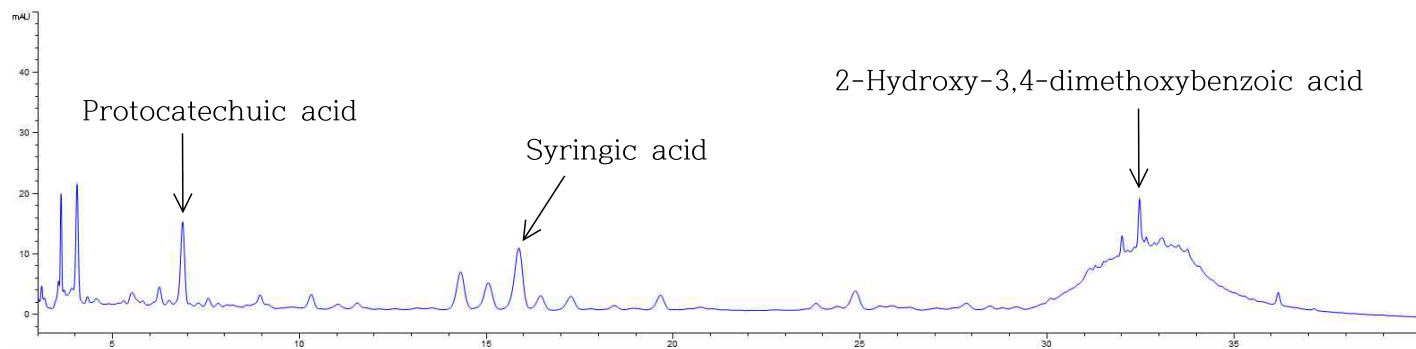

# Supplementary Figure 3

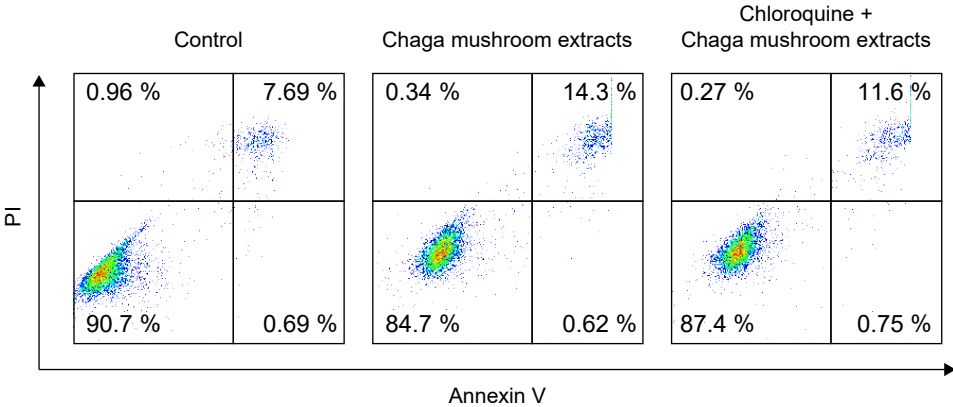

# Supplementary Figure 4

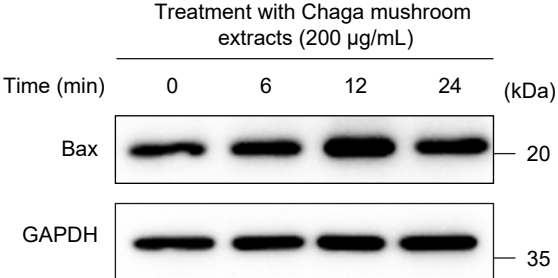

# Supplementary Figure 5

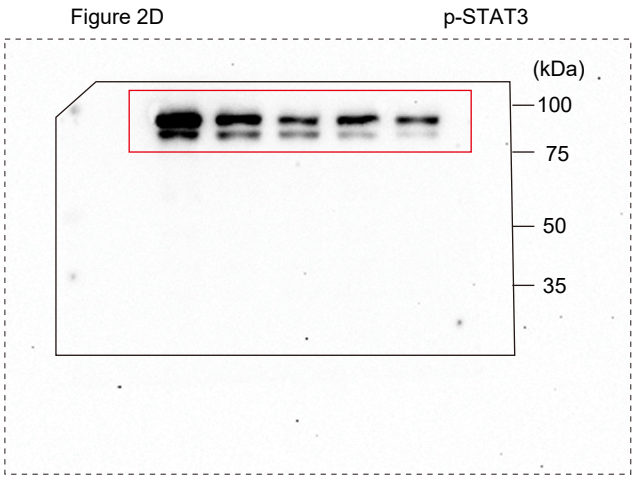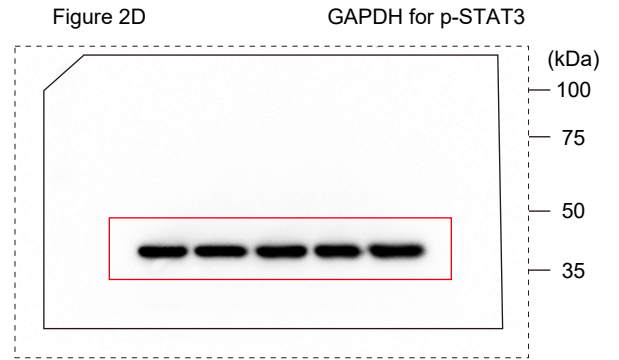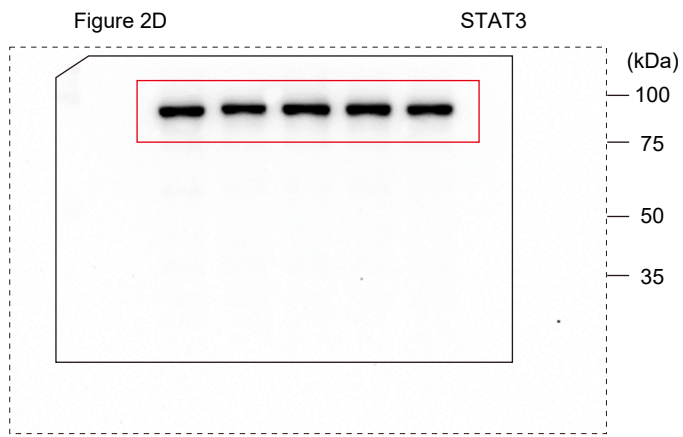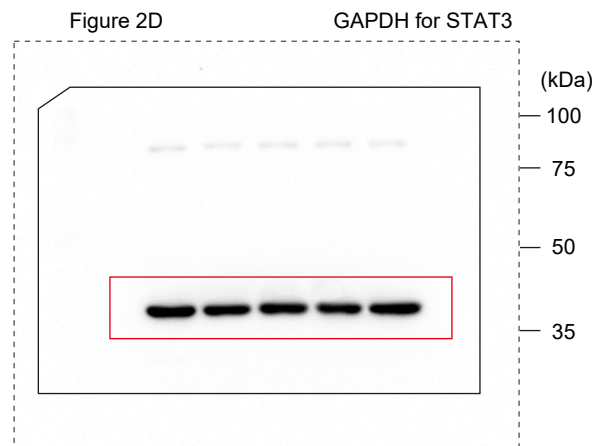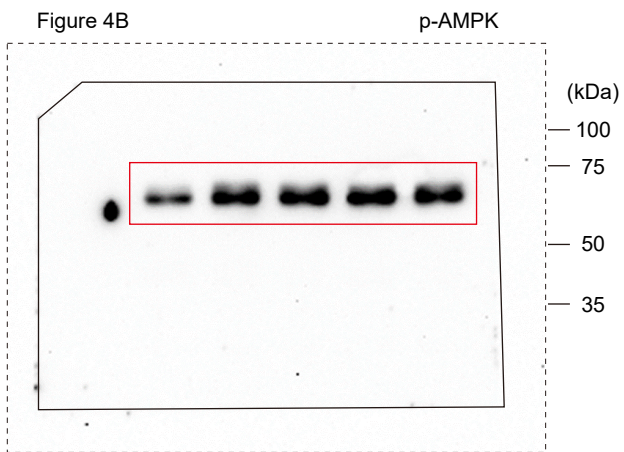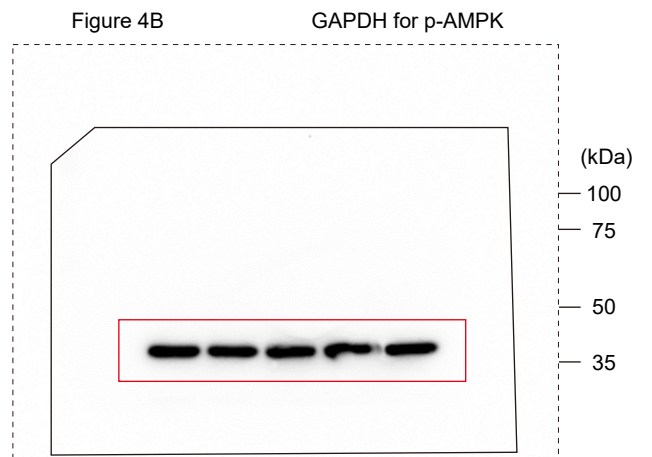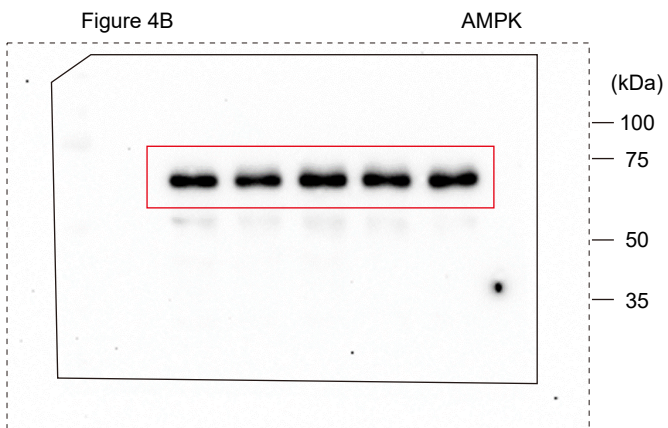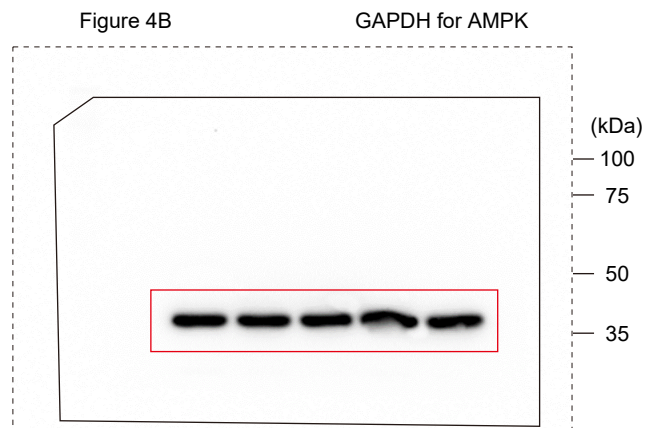

# Supplementary Figure 5 (continued)

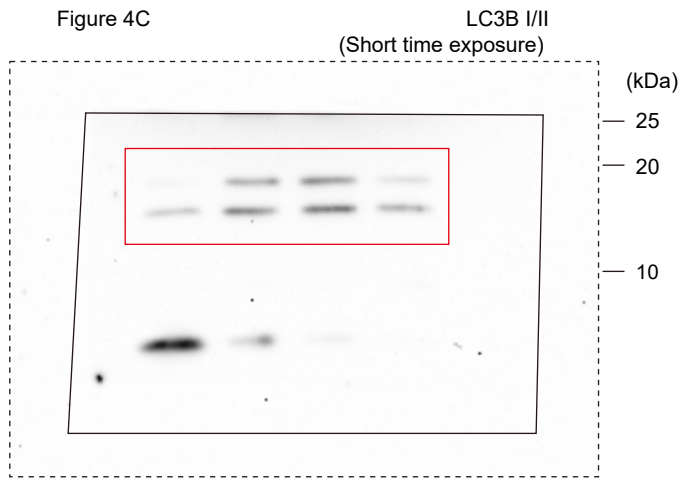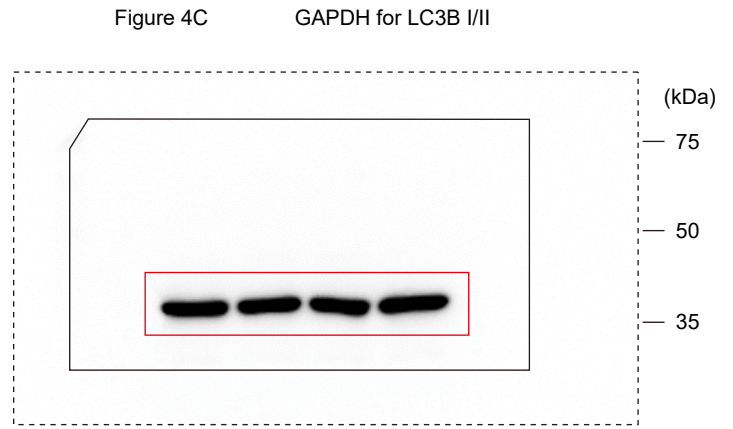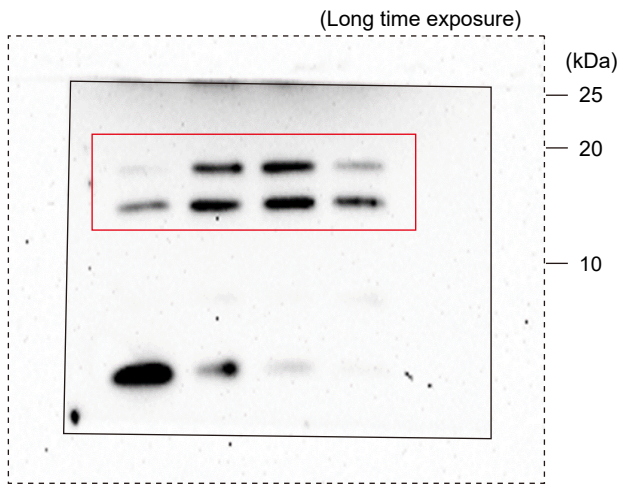

Figure 6D p-p38

Figure 6D GAPDH for p-p38

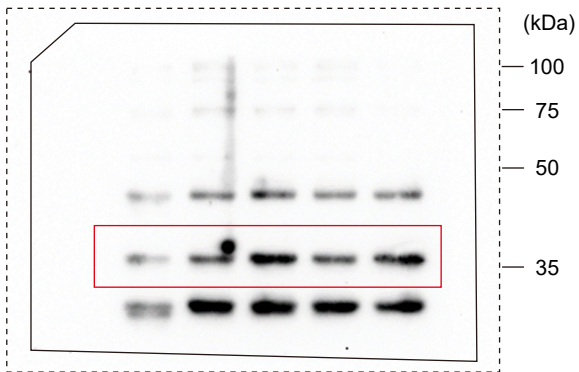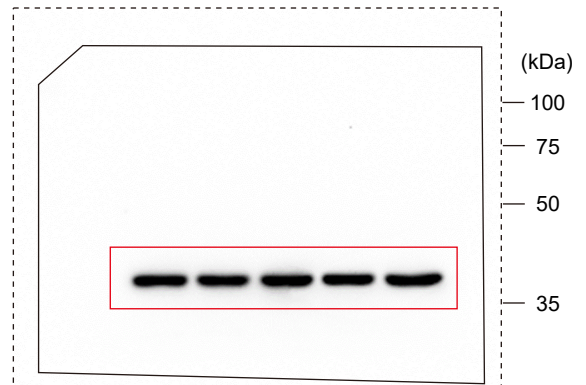

Figure 6D p38

Figure 6D GAPDH for p38

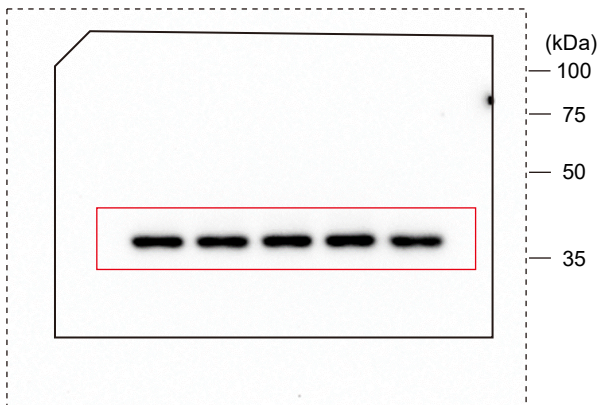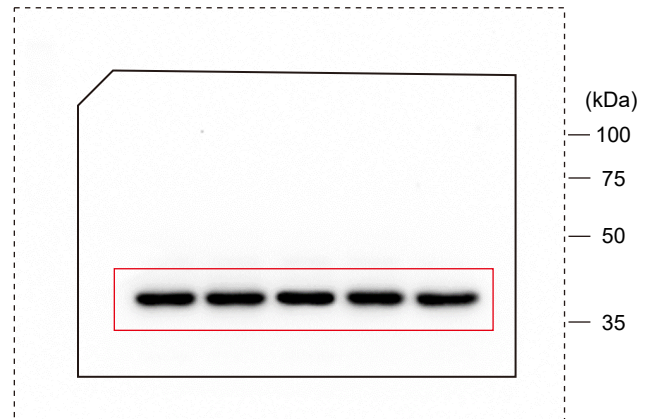

# Supplementary Figure 5 (continued)

Figure 6E

p-p65

(Short time exposure)

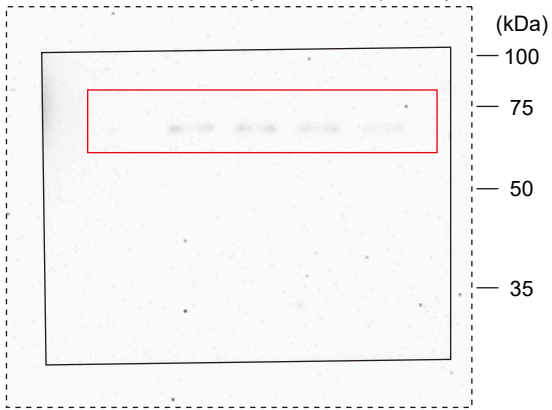

Figure 6E

GAPDH for p-p65

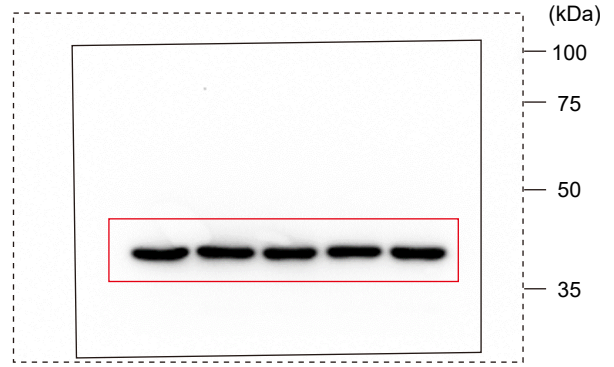

(Long time exposure)

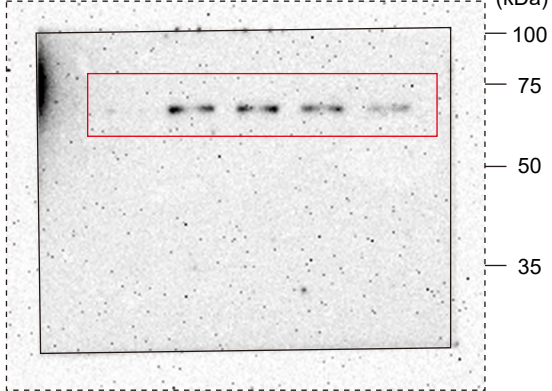

Figure 6E

p65

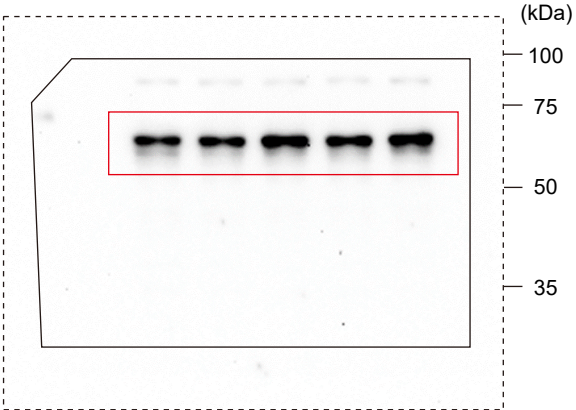

Figure 6E

GAPDH for p65

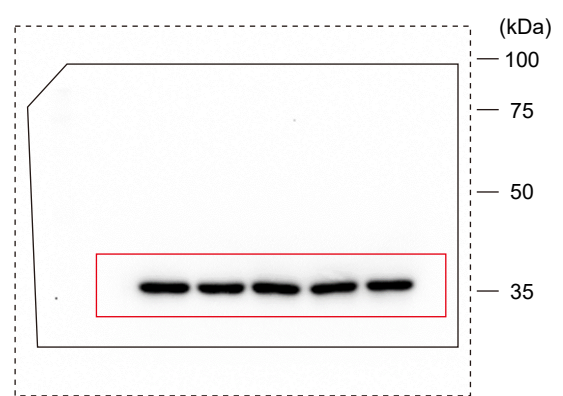

Supplementary Figure 4

Bax

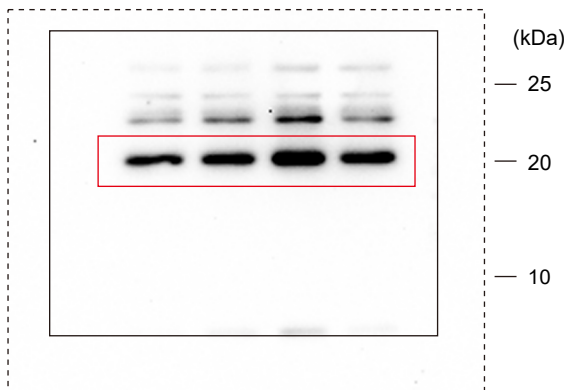

Supplementary Figure 4

GAPDH for Bax

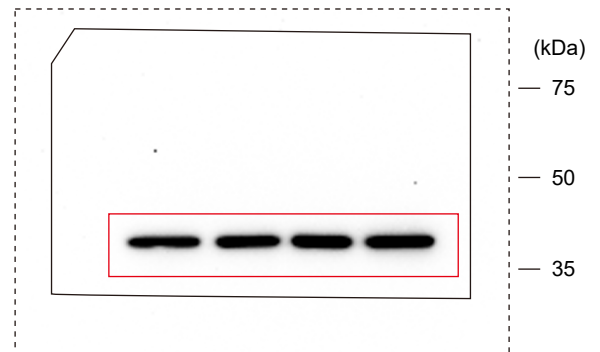

Supplement: 41598_2024_61125_MOESM1_ESM.pdf [file 41598_2024_61125_MOESM1_ESM.pdf]
